# Supplementary material for: Effects of age and time since injury on traumatic brain injury blood biomarkers: a TRACK-TBI study
Source: PubMed Central journal article supplement (PMC9832515; doi:10.1093/braincomms/fcac316), 2022-12-01
Supplement: fcac316_supplementary_data.pdf [file fcac316_supplementary_data.pdf]

## Supplementary Material

Supplemental Table 1. Characteristics of Orthopedic Controls by Age Group

| Characteristic<br>N(%) or mean(SD)        | 17-39y<br>N=136 | 40-64y<br>N=89 | 65-90y<br>N=17 | p-value |
|-------------------------------------------|-----------------|----------------|----------------|---------|
| <b>Age (years)</b>                        | 28.4 ±5.8       | 51.5 ±7.4      | 71.3 ±5.1      | <0.001  |
| <b>Female</b>                             | 42 (30.88%)     | 34 (38.2 %)    | 9 (52.94%)     | 0.154   |
| <b>Race</b>                               |                 |                |                | 0.316   |
| White                                     | 99 (75.57%)     | 74 (84.09%)    | 14 (82.35%)    |         |
| Black                                     | 23 (17.56%)     | 11 (12.5%)     | 1 (5.88%)      |         |
| Other                                     | 9 (6.87%)       | 3 (3.41%)      | 2 (11.76%)     |         |
| <b>Hispanic</b>                           | 38 (28.57%)     | 17 (19.32%)    | 3 (18.75%)     | 0.274   |
| <b>Education (years)</b>                  | 13.8±2.5        | 13.6 ±3.0      | 15.2 ±3.3      | 0.061   |
| <b>Past medical history</b>               |                 |                |                |         |
| HTN                                       | 3 (2.21%)       | 22 (24.72%)    | 10 (58.82%)    | <0.001  |
| Hyperlipidemia                            | 1 (0.74%)       | 2 (2.25%)      | 4 (23.53%)     | <0.001  |
| Ischemic heart disease                    | 0 (0%)          | 0 (0%)         | 0 (0%)         | -       |
| Stroke or TIA                             | 0 (0%)          | 2 (2.25%)      | 0 (0%)         | 0.261   |
| Diabetes                                  | 3 (2.21%)       | 10 (11.24%)    | 3 (17.65%)     | 0.003   |
| Renal disease                             | 4 (2.94%)       | 4 (4.49%)      | 1 (5.88%)      | 0.555   |
| Pulmonary disease                         | 23 (16.91%)     | 9 (10.11%)     | 4 (23.53%)     | 0.192   |
| Prior TBI                                 | 33 (25.38%)     | 21 (24.42%)    | 1 (5.88%)      | 0.192   |
| <b>Psychiatric history</b>                | 34 (25.0%)      | 26 (29.21%)    | 3 (17.65%)     | 0.617   |
| <b>Disposition</b>                        |                 |                |                | 0.015   |
| ED discharge                              | 59 (43.38%)     | 27 (30.34%)    | 2 (11.76%)     |         |
| Hospital ward admit                       | 68 (50%)        | 55 (61.8%)     | 11 (64.71%)    |         |
| ICU admit                                 | 9 (6.62%)       | 7 (7.87%)      | 4 (23.53%)     |         |
| <b>Blood draw time post-injury, hours</b> | 12.6 ±7.2       | 14.0 ±7.7      | 15.2 ±6.7      | 0.155   |

**Supplemental Table 2. Demographics of “Friend” Healthy Controls by Age Group**

| <b>Characteristic</b>               | <b>17-39y</b> | <b>40-64y</b> | <b>65-90y</b> | <b>p-value</b> |
|-------------------------------------|---------------|---------------|---------------|----------------|
| N(%) or mean (standard deviation)   | <b>N=67</b>   | <b>N=31</b>   | <b>N=6</b>    |                |
| <b>Age (years)</b>                  | 27.2 ±5.6     | 51.0 ±6.1     | 69.2±3.9      | <0.001         |
| <b>Female</b>                       | 33 (49.3%)    | 25 (80.7%)    | 4 (66.7%)     | 0.009          |
| <b>Race</b>                         |               |               |               |                |
| White                               | 53 (80.3%)    | 26 (83.9%)    | 5 (83.3%)     | 0.896          |
| Black                               | 8 (12.1%)     | 4 (12.9%)     | 1 (16.7%)     |                |
| Other                               | 5 (7.6%)      | 1 (3.2%)      | 0 (0%)        |                |
| <b>Hispanic</b>                     | 14 (21.2%)    | 4 (12.9%)     | 0 (0%)        | 0.458          |
| <b>Education (years)</b>            | 14.1±2.0      | 13.7±2.7      | 15.3±2.0      | 0.133          |
| <b>Past medical history</b>         |               |               |               |                |
| Hypertension                        | 2 (3.0%)      | 4 (12.9%)     | 3 (50%)       | 0.005          |
| Hyperlipidemia                      | 0 (0%)        | 0 (0%)        | 0 (0%)        | -              |
| Ischemic heart disease              | 0 (0%)        | 0 (0%)        | 0 (0%)        | -              |
| Stroke or transient ischemic attack | 0 (0%)        | 0 (0%)        | 1 (16.7%)     | 0.061          |
| Diabetes                            | 1 (1.5%)      | 1 (3.2%)      | 1 (16.7%)     | 0.121          |
| Renal disease                       | 2 (3.0%)      | 1 (3.2%)      | 0 (0%)        | >0.999         |
| Pulmonary disease                   | 12 (17.9%)    | 7 (22.6%)     | 2 (33.3%)     | 0.505          |
| Prior traumatic brain injury        | 22 (32.8%)    | 8 (25.8%)     | 2 (33.3%)     | 0.790          |
| <b>Psychiatric history</b>          | 13 (19.4%)    | 12 (38.7%)    | 3 (50%)       | 0.039          |

**Supplemental Table 3. Demographics of “Community” Healthy Controls by Age Group**

| <b>Characteristic</b>             | <b>17-39y</b> | <b>40-64y</b> | <b>65-90y</b> | <b>p-value</b> |
|-----------------------------------|---------------|---------------|---------------|----------------|
| N(%) or mean (standard deviation) | <b>N=63</b>   | <b>N=26</b>   | <b>N=16</b>   |                |
| <b>Age (years)</b>                | 27.8 ±5.7     | 52.1 ±7.3     | 75.6 ±7.0     | <0.001         |
| <b>Female</b>                     | 24 (38.1%)    | 9 (34.6%)     | 8 (50%)       | 0.577          |

**Supplemental Table 4. Day 1 blood-based biomarkers levels stratified by diagnostic group, age, and sampling time interval**

| Values are median (interquartile range) | 17-39y                | P-value | 40-64y                | P-value | 65-90y                  | P-value  |
|-----------------------------------------|-----------------------|---------|-----------------------|---------|-------------------------|----------|
| <b>GFAP, pg/mL</b>                      |                       |         |                       |         |                         |          |
| <b>0-6h</b>                             |                       |         |                       |         |                         |          |
| TBI/CT+                                 | 1281.1 (522.2-7976.6) |         | 1026.6 (264.7-2229.0) |         | 912.0 (378.7-3072.9)**  |          |
| TBI/CT- (Ref:TBI/CT+)                   | 57.4 (12.4-213.2)     | <0.001  | 82.7 (17.4-244.2)     | <0.001  | 87.9 (47.5-163.0)*      | (<0.001) |
| All TBI                                 | 86.3 (14.6-377.9)     |         | 171.0 (26.5-504.8)    |         | 110.0 (74.0-705.9)      |          |
| OC (Ref:All TBI)                        | 6.9 (3.6-12.2)        | <0.001  | 14.7 (7.6-23.0)       | <0.001  | 98.2 (56.4-140.0)**     | (0.443)  |
| HC (Ref:All TBI)                        | 5.0 (2.0-10.0)        | <0.001  | 10.0 (5.0-15.0)       | <0.001  | 28.5 (25.3-38.8)        | <0.001   |
| <b>7-12h</b>                            |                       |         |                       |         |                         |          |
| TBI/CT+                                 | 1680.7 (735.6-3842.2) |         | 1805.5 (671.0-3540.0) |         | 543.1 (247.8-3040.3)    |          |
| TBI/CT- (Ref:TBI/CT+)                   | 184.6 (54.7-573.0)    | <0.001  | 317.9 (64.1-698.0)    | <0.001  | 115.2 (38.5-379.2)*     | 0.004    |
| All TBI                                 | 473.3 (100.6-1563.0)  |         | 705.4 (158.7-2132.5)  |         | 351.8 (211.5-1718.1)    |          |
| OC (Ref:All TBI)                        | 11.0 (5.3-32.8)       | <0.001  | 13.2 (9.0-45.0)*      | <0.001  | 38.1 (22.0-47.0)**      | (<0.001) |
| HC (Ref:All TBI)                        | 5.0 (2.0-10.0)        | <0.001  | 10.0 (5.0-15.0)       | <0.001  | 28.5 (25.3-38.8)        | <0.001   |
| <b>13-24h</b>                           |                       |         |                       |         |                         |          |
| TBI/CT+                                 | 1609.8 (596.0-4161.3) |         | 1520.6 (546.3-3240.3) |         | 1197.0 (430.9-3351.3)   |          |
| TBI/CT- (Ref:TBI/CT+)                   | 142.6 (22.6-433.9)    | <0.001  | 190.4 (49.7-447.7)    | <0.001  | 242.6 (54.2-464.4)      | <0.001   |
| All TBI                                 | 460.6 (95.1-1720.5)   |         | 630.6 (166.5-2090.4)  |         | 833.3 (294.0-2675.6)    |          |
| OC (Ref:All TBI)                        | 8.0 (3.3-21.4)        | <0.001  | 14.4 (7.5-26.5)       | <0.001  | 25.5 (16.1-41.0)*       | <0.001   |
| HC (Ref:All TBI)                        | 5.0 (2.0-10.0)        | <0.001  | 10.0 (5.0-15.0)       | <0.001  | 28.5 (25.3-38.8)        | <0.001   |
| <b>UCH-LI, pg/mL</b>                    |                       |         |                       |         |                         |          |
| <b>0-6h</b>                             |                       |         |                       |         |                         |          |
| TBI/CT+                                 | 934.2 (541.3-1805.4)  |         | 657.6 (279.9-1483.3)  |         | 688.1 (215.1-1350.2)**  |          |
| TBI/CT- (Ref:TBI/CT+)                   | 216.5 (114.4-382.1)   | <0.001  | 237.6 (159.6-461.0)   | <0.001  | 256.8 (184.9-567.2)*    | (0.163)  |
| All TBI                                 | 242.0 (123.7-538.5)   |         | 308.3 (163.1-726.6)   |         | 348.8 (185.1-602.2)     |          |
| OC (Ref:All TBI)                        | 114.0 (78.8-170.3)    | <0.001  | 139.8 (97.5-209.0)    | <0.001  | 1638.3 (956.0-2320.6)** | (0.315)  |
| HC (Ref:All TBI)                        | 47.0 (37.0-68.0)      | <0.001  | 74.0 (52.3-96.0)      | <0.001  | 109.0 (75.3-156.8)      | <0.001   |
| <b>7-12h</b>                            |                       |         |                       |         |                         |          |
| TBI/CT+                                 | 737.7 (305.1-1192.9)  |         | 554.1 (206.0-1423.0)  |         | 323.9 (190.1-1134.8)    |          |
| TBI/CT- (Ref:TBI/CT+)                   | 190.8 (88.7-415.1)    | <0.001  | 216.7 (114.6-307.3)   | <0.001  | 295.0 (154.8-373.9)*    | 0.298    |
| All TBI                                 | 284.0 (120.4-795.6)   |         | 290.7 (141.5-679.1)   |         | 300.8 (186.5-614.0)     |          |
| OC (Ref:All TBI)                        | 213.9 (138.6-299.4)   | 0.104   | 169.6 (77.4-244.8)*   | 0.016   | 285.6 (141.6-442.7)**   | (0.408)  |
| HC (Ref:All TBI)                        | 68.0 (47.0-356.0)     | <0.001  | 74.0 (52.3-96.0)      | <0.001  | 109.0 (75.3-156.8)      | <0.001   |
| <b>13-24h</b>                           |                       |         |                       |         |                         |          |
| TBI/CT+                                 | 314.7 (139.3-567.0)   |         | 277.3 (139.7-686.0)   |         | 227.1 (148.8-462.1)     |          |
| TBI/CT- (Ref:TBI/CT+)                   | 107.7 (58.0-2132.3)   | <0.001  | 146.4 (82.7-246.8)    | <0.001  | 183.8 (129.0-304.2)     | 0.100    |
| All TBI                                 | 169.4 (81.0-376.7)    |         | 199.0 (107.7-427.0)   |         | 221.4 (137.0-432.9)     |          |
| OC (Ref:All TBI)                        | 102.7 (68.2-150.9)    | <0.001  | 119.8 (76.5-170.6)    | <0.001  | 115.7 (95.2-183.7)*     | 0.023    |
| HC (Ref:All TBI)                        | 47.0 (37.0-68.0)      | <0.001  | 74.0 (52.3-96.0)      | <0.001  | 109.0 (75.3-156.8)      | <0.001   |

| <b>S100B, ug/L</b>       |                   |        |                   |        |                    |         |
|--------------------------|-------------------|--------|-------------------|--------|--------------------|---------|
| <b>0-6h</b>              |                   |        |                   |        |                    |         |
| TBI/CT+                  | 0.37 (0.23-0.61)  |        | 0.40 (0.23-0.73)  |        | 0.25 (0.20-0.46)** |         |
| TBI/CT-<br>(Ref:TBI/CT+) | 0.12 (0.08-0.23)  | <0.001 | 0.15 (0.09-0.27)  | <0.001 | 0.19 (0.08-0.33)*  | (0.441) |
| All TBI                  | 0.14 (0.08-0.27)  |        | 0.21 (0.11-0.37)  |        | 0.23 (0.09-0.33)   |         |
| OC<br>(Ref:All TBI)      | 0.09 (0.06-0.16)  | 0.008  | 0.09 (0.06-0.13)  | <0.001 | 0.46 (0.32-0.61)** | (0.519) |
| HC<br>(Ref:All TBI)      | 0.04 (0.03-0.06)  | <0.001 | 0.05 (0.04-0.07)  | <0.001 | 0.04 (0.04-0.07)   | <0.001  |
| <b>7-12h</b>             |                   |        |                   |        |                    |         |
| TBI/CT+                  | 0.30 (0.16-0.54)  |        | 0.23 (0.12-0.56)  |        | 0.16 (0.11-0.53)   |         |
| TBI/CT-<br>(Ref:TBI/CT+) | 0.13 (0.08-0.22)  | <0.001 | 0.14 (0.08-0.18)  | <0.001 | 0.12 (0.08-0.16)*  | 0.072   |
| All TBI                  | 0.17 (0.10-0.31)  |        | 0.16 (0.10-0.29)  |        | 0.14 (0.09-0.36)   |         |
| OC<br>(Ref:All TBI)      | 0.12 (0.09-0.19)* | 0.054  | 0.12 (0.08-0.15)* | 0.024  | 0.13 (0.11-0.13)** | (0.683) |
| HC<br>(Ref:All TBI)      | 0.04 (0.03-0.06)  | <0.001 | 0.05 (0.04-0.07)  | <0.001 | 0.04 (0.04-0.07)   | <0.001  |
| <b>13-24h</b>            |                   |        |                   |        |                    |         |
| TBI/CT+                  | 0.18 (0.10-0.35)  |        | 0.16 (0.09-0.38)  |        | 0.14 (0.07-0.28)   |         |
| TBI/CT-<br>(Ref:TBI/CT+) | 0.09 (0.06-0.16)  | <0.001 | 0.09 (0.06-0.14)  | <0.001 | 0.10 (0.07-0.14)   | 0.022   |
| All TBI                  | 0.12 (0.07-0.24)  |        | 0.12 (0.08-0.23)  |        | 0.12 (0.07-0.25)   |         |
| OC<br>(Ref:All TBI)      | 0.07 (0.05-0.12)  | <0.001 | 0.08 (0.06-0.11)  | <0.001 | 0.08 (0.07-0.09)** | (0.077) |
| HC<br>(Ref:All TBI)      | 0.04 (0.03-0.06)  | <0.001 | 0.05 (0.04-0.07)  | <0.001 | 0.04 (0.04-0.07)   | <0.001  |
| <b>NSE, ng/mL</b>        |                   |        |                   |        |                    |         |
| <b>0-6h</b>              |                   |        |                   |        |                    |         |
| TBI/CT+                  | 29.7 (19.7-65.7)  |        | 22.0 (16.3-42.0)  |        | 29.4 (16.4-42.2)** |         |
| TBI/CT-<br>(Ref:TBI/CT+) | 16.5 (13.9-23.8)  | <0.001 | 17.0 (12.7-26.8)  | 0.026  | 21.7 (15.6-28.2)*  | (0.515) |
| All TBI                  | 18.0 (14.2-27.3)  |        | 18.5 (13.2-31.4)  |        | 21.7 (15.6-36.9)   |         |
| OC<br>(Ref:All TBI)      | 17.6 (12.9-23.0)  | 0.244  | 13.8 (10.8-17.8)  | 0.017  | 20.8 (16.8-24.8)** | (0.769) |
| HC<br>(Ref:All TBI)      | 12.1 (10.3-14.3)  | <0.001 | 12.6 (11.1-15.4)  | <0.001 | 13.7 (11.3-21.7)   | 0.069   |
| <b>7-12h</b>             |                   |        |                   |        |                    |         |
| TBI/CT+                  | 33.2 (22.8-51.8)  |        | 34.7 (19.6-59.0)  |        | 20.8 (13.5-28.0)   |         |
| TBI/CT-<br>(Ref:TBI/CT+) | 23.3 (15.4-36.9)  | <0.001 | 17.7 (12.5-39.1)  | <0.001 | 18.4 (10.7-20.9)*  | 0.192   |
| All TBI                  | 26.2 (16.4-43.8)  |        | 23.8 (15.1-49.6)  |        | 18.6 (13.4-25.2)   |         |
| OC<br>(Ref:All TBI)      | 15.9 (11.4-27.7)* | 0.009  | 19.5 (12.8-31.4)* | 0.306  | 20.0 (15.2-27.4)** | (0.597) |
| HC<br>(Ref:All TBI)      | 12.1 (10.3-14.3)  | <0.001 | 12.6 (11.1-15.4)  | <0.001 | 13.7 (11.3-21.7)   | 0.222   |
| <b>13-24h</b>            |                   |        |                   |        |                    |         |
| TBI/CT+                  | 30.2 (19.7-48.9)  |        | 23.0 (14.8-43.4)  |        | 18.0 (13.3-31.8)   |         |
| TBI/CT-<br>(Ref:TBI/CT+) | 18.3 (13.3-29.1)  | <0.001 | 17.9 (13.2-24.9)  | <0.001 | 18.7 (15.3-32.1)   | 0.905   |
| All TBI                  | 22.9 (15.2-40.0)  |        | 19.5 (14.1-34.2)  |        | 18.2 (14.1-31.9)   |         |
| OC<br>(Ref:All TBI)      | 15.1 (12.1-21.2)  | <0.001 | 15.6 (12.0-19.9)  | 0.001  | 13.3 (9.7-17.1)**  | (0.010) |
| HC<br>(Ref:All TBI)      | 12.1 (10.3-14.3)  | <0.001 | 12.6 (11.1-15.4)  | <0.001 | 13.7 (11.3-21.7)   | 0.049   |

Notes:

\*N=10 to <20 in this sub-group

\*\*N<10 in this sub-group.

P-values are from the Wilcoxon Rank Sum test comparing the biomarkers between diagnostic groups.

P-values for comparisons in which at least one cell contains fewer than 10 individuals are shown in parentheses.

Abbreviations: GFAP = glial fibrillary acidic protein; Ref = reference group; TBI = traumatic brain injury; OC = orthopedic trauma control; HC = healthy control; UCH-L1 = ubiquitin carboxy-terminal hydrolase L1; S100B = S100 calcium binding protein B; NSE = neuron specific enolase

**Supplemental Table 5. Discriminative value of day 1 blood-based biomarkers stratified by age and sampling time interval**

| Values are AUC (95% CI) | 17-39y                      | 40-64y                      | 65-90y                     |
|-------------------------|-----------------------------|-----------------------------|----------------------------|
| <b>GFAP</b>             |                             |                             |                            |
| TBI:CT+ vs. TBI:CT-     |                             |                             |                            |
| 0-6h                    | <b>0.906 (0.834,0.978)</b>  | <b>0.867 (0.796,0.938)</b>  | <b>0.895 (0.775,1)</b>     |
| 7-12h                   | <b>0.850 (0.802,0.898)</b>  | <b>0.845 (0.781,0.91)</b>   | 0.775 (0.613,0.936)        |
| 13-24h                  | <b>0.868 (0.842,0.893)</b>  | <b>0.841 (0.807,0.875)</b>  | <b>0.828 (0.760,0.896)</b> |
| TBI vs. OC              |                             |                             |                            |
| 0-6h                    | <b>0.864 (0.812,0.916)</b>  | <b>0.825 (0.749,0.902)</b>  | 0.685 (0.130,1)            |
| 7-12h                   | <b>0.900 (0.844,0.956)</b>  | <b>0.910 (0.833,0.987)</b>  | <b>0.922 (0.827,1)</b>     |
| 13-24h                  | <b>0.901 (0.872,0.929)*</b> | <b>0.934 (0.904,0.963)*</b> | <b>0.978 (0.956,0.999)</b> |
| TBI vs. HC              |                             |                             |                            |
| 0-6h                    | <b>0.899 (0.865,0.933)</b>  | <b>0.878 (0.830,0.926)</b>  | <b>0.912 (0.825,1)</b>     |
| 7-12h                   | <b>0.976 (0.962,0.989)</b>  | <b>0.965 (0.940,0.990)</b>  | <b>0.942 (0.885,1)</b>     |
| 13-24h                  | <b>0.959 (0.948,0.971)</b>  | <b>0.969 (0.956,0.982)</b>  | <b>0.972 (0.950,0.994)</b> |
| <b>UCH-LI</b>           |                             |                             |                            |
| TBI:CT+ vs. TBI:CT-     |                             |                             |                            |
| 0-6h                    | <b>0.876 (0.798,0.953)</b>  | 0.700 (0.591,0.808)         | 0.678 (0.408,0.948)        |
| 7-12h                   | 0.773 (0.712,0.834)         | 0.739 (0.653,0.825)         | 0.604 (0.425,0.784)        |
| 13-24h                  | 0.752 (0.717,0.787)*        | 0.693 (0.647,0.738)         | 0.589 (0.487,0.690)        |
| TBI vs. OC              |                             |                             |                            |
| 0-6h                    | 0.762 (0.688,0.835)         | 0.754 (0.663,0.846)         | 0.741 (0.224,1)            |
| 7-12h                   | 0.605 (0.509,0.700)         | 0.696 (0.559,0.833)         | 0.620 (0.326,0.913)        |
| 13-24h                  | 0.660 (0.606,0.713)         | 0.675 (0.605,0.745)         | 0.715 (0.564,0.865)        |
| TBI vs. HC              |                             |                             |                            |
| 0-6h                    | <b>0.930 (0.899,0.961)</b>  | <b>0.917 (0.878,0.956)</b>  | <b>0.879 (0.786,0.972)</b> |
| 7-12h                   | <b>0.923 (0.898,0.949)</b>  | <b>0.895 (0.851,0.939)</b>  | <b>0.873 (0.782,0.963)</b> |
| 13-24h                  | <b>0.863 (0.835,0.892)</b>  | <b>0.841 (0.798,0.884)</b>  | 0.772 (0.678,0.867)        |
| <b>S100B</b>            |                             |                             |                            |
| TBI:CT+ vs. TBI:CT-     |                             |                             |                            |
| 0-6h                    | <b>0.813 (0.720,0.906)</b>  | 0.772 (0.673,0.872)         | 0.599 (0.341,0.856)        |
| 7-12h                   | 0.749 (0.683,0.815)         | 0.707 (0.616,0.798)         | 0.687 (0.513,0.860)        |
| 13-24h                  | 0.703 (0.665,0.742)         | 0.710 (0.664,0.756)         | 0.623 (0.53,0.717)         |
| TBI vs. OC              |                             |                             |                            |
| 0-6h                    | 0.636 (0.551,0.720)         | 0.755 (0.669,0.841)         | 0.648 (0.092,1)            |
| 7-12h                   | 0.633 (0.514,0.752)         | 0.690 (0.555,0.826)         | 0.559 (0.307,0.811)        |
| 13-24h                  | 0.671 (0.611,0.731)         | 0.687 (0.619,0.755)         | 0.675 (0.553,0.798)        |
| TBI vs. HC              |                             |                             |                            |
| 0-6h                    | <b>0.901 (0.865,0.937)</b>  | <b>0.889 (0.842,0.936)</b>  | <b>0.896 (0.812,0.979)</b> |
| 7-12h                   | <b>0.946 (0.921,0.971)</b>  | <b>0.909 (0.865,0.953)</b>  | <b>0.885 (0.797,0.972)</b> |
| 13-24h                  | <b>0.888 (0.806,0.916)</b>  | <b>0.842 (0.793,0.891)</b>  | <b>0.826 (0.736,0.917)</b> |
| <b>NSE</b>              |                             |                             |                            |
| TBI:CT+ vs. TBI:CT-     |                             |                             |                            |
| 0-6h                    | 0.743 (0.626,0.859)         | 0.634 (0.520,0.747)         | 0.586 (0.309,0.862)        |
| 7-12h                   | 0.650 (0.577,0.723)         | 0.676 (0.580,0.772)         | 0.637 (0.438,0.836)        |
| 13-24h                  | 0.678 (0.638,0.717)*        | 0.611 (0.560,0.661)         | 0.507 (0.405,0.608)        |
| TBI vs. OC              |                             |                             |                            |
| 0-6h                    | 0.560 (0.461,0.659)         | 0.661 (0.556,0.766)         | 0.574 (0.015,1)            |
| 7-12h                   | 0.680 (0.544,0.815)         | 0.587 (0.413,0.760)         | 0.578 (0.296,0.861)        |
| 13-24h                  | 0.668 (0.603,0.733)         | 0.639 (0.565,0.713)         | 0.756 (0.628,0.885)        |
| TBI vs. HC              |                             |                             |                            |
| 0-6h                    | 0.764 (0.706,0.821)         | 0.729 (0.656,0.802)         | 0.653 (0.489,0.818)        |
| 7-12h                   | <b>0.836 (0.791,0.880)*</b> | <b>0.801 (0.739,0.863)*</b> | 0.596 (0.438,0.755)        |
| 13-24h                  | <b>0.806 (0.767,0.846)*</b> | 0.770 (0.719,0.821)         | 0.630 (0.497,0.762)        |

Notes: **Bolded result** indicates AUC at least 0.8 (at least "good" discrimination).

\*P<0.05 vs. 65-90y

Abbreviations: AUC = area under the curve; CI = confidence interval. All other abbreviations as defined in Supplemental Table 4.

**Supplemental Table 6. Characteristics of Longitudinal TBI Cohort**

| <b>Characteristic</b><br>N(%) or mean±standard deviation | <b>17-39y</b><br><b>N=261</b> | <b>40-64y</b><br><b>N=198</b> | <b>65-90</b><br><b>N=63</b> |
|----------------------------------------------------------|-------------------------------|-------------------------------|-----------------------------|
| <b>Age, years</b>                                        | 27.2±6.4                      | 52.2±7.1                      | 73.3±6.4                    |
| <b>Female</b>                                            | 79 (30.27%)                   | 37 (18.69%)                   | 25 (39.68%)                 |
| <b>Race</b>                                              |                               |                               |                             |
| White                                                    | 196 (75.68%)                  | 172 (87.31%)                  | 57 (90.48%)                 |
| Black                                                    | 42 (16.22%)                   | 18 (9.14%)                    | 3 (4.76%)                   |
| Other                                                    | 21 (8.11%)                    | 7 (3.55%)                     | 3 (4.76%)                   |
| <b>Hispanic</b>                                          | 53 (20.46%)                   | 49 (24.87%)                   | 7 (11.11%)                  |
| <b>Education, years</b>                                  | 12.8±2.2                      | 13.0±3.4                      | 14.2±3.7                    |
| <b>Past medical history</b>                              |                               |                               |                             |
| Hypertension                                             | 9 (3.45%)                     | 54 (27.27%)                   | 29 (46.03%)                 |
| Hyperlipidemia                                           | 3 (1.15%)                     | 17 (8.59%)                    | 16 (25.4%)                  |
| Ischemic heart disease                                   | 0 (0%)                        | 0 (0%)                        | 3 (4.76%)                   |
| Stroke or transient ischemic attack                      | 1 (0.38%)                     | 2 (1.01%)                     | 5 (7.94%)                   |
| Diabetes                                                 | 3 (1.15%)                     | 27 (13.64%)                   | 10 (15.87%)                 |
| Renal disease                                            | 9 (3.45%)                     | 9 (4.55%)                     | 10 (15.87%)                 |
| Pulmonary disease                                        | 17 (6.51%)                    | 22 (11.11%)                   | 13 (20.63%)                 |
| Prior traumatic brain injury                             | 61 (24.02%)                   | 47 (24.48%)                   | 11 (17.74%)                 |
| Psychiatric history                                      | 56 (21.46%)                   | 45 (22.73%)                   | 15 (23.81%)                 |
| <b>Presenting Glasgow Coma Scale</b>                     |                               |                               |                             |
| 3-8                                                      | 90 (35.43%)                   | 51 (26.7%)                    | 4 (6.67%)                   |
| 9-12                                                     | 22 (8.66%)                    | 23 (12.04%)                   | 3 (5%)                      |
| 13-15                                                    | 142 (55.91%)                  | 117 (61.26%)                  | 53 (88.33%)                 |
| <b>Disposition</b>                                       |                               |                               |                             |
| Emergency department discharge                           | 0 (0%)                        | 0 (0%)                        | 0 (0%)                      |
| Hospital ward admit                                      | 64 (24.52%)                   | 40 (20.2%)                    | 21 (33.33%)                 |
| Intensive care unit admit                                | 197 (75.48%)                  | 158 (79.8%)                   | 42 (66.67%)                 |

**Supplemental Table 7. Blood-Based Biomarker Evolution over Two Weeks by Age**

| Values are median (interquartile range) | 17-39y                 | N   | P        | 40-64y                | N   | P        | 65-90y                | N  | P        |
|-----------------------------------------|------------------------|-----|----------|-----------------------|-----|----------|-----------------------|----|----------|
| <b>GFAP, pg/mL</b>                      |                        |     |          |                       |     |          |                       |    |          |
| <b>Day 1</b>                            |                        |     |          |                       |     |          |                       |    |          |
| TBI/CT+                                 | 2607.7 (1218.2-6229.1) | 168 |          | 2123.7(1058.8-4131.6) | 134 |          | 2079.0(633.6-4192.0)  | 49 |          |
| TBI/CT- (Ref:TBI/CT+)                   | 277.2(94.2-820.4)      | 87  | <0.001   | 374.6(88.7-1045.4)    | 54  | <0.001   | 157.0(95.0-301.3)     | 13 | <0.001   |
| All TBI                                 | 1481.7 (450.2-4272.7)  | 261 |          | 1452.4(496.5-3085.5)  | 198 |          | 1054.7(316.6-3433.9)  | 63 |          |
| OC (Ref:All TBI)                        | 17.6 (9.3-40.8)        | 10  | <0.001   | 14.7(9.3-17.6)        | 10  | <0.001   | 19.3(14.0-126.2)      | 4  | (0.007)  |
| HC (Ref: All TBI)                       | 5.0 (2.0-10.0)         | 129 | <0.001   | 10.0(5.0-15.0)        | 58  | <0.001   | 28.5(25.3-38.8)       | 22 | <0.001   |
| <b>Day 3</b>                            |                        |     |          |                       |     |          |                       |    |          |
| TBI/CT+                                 | 650.8(238.3-1764.3)    | 158 |          | 781.3(197.6-2898.0)   | 128 |          | 602.4(270.8-1752.3)   | 46 |          |
| TBI/CT- (Ref:TBI/CT+)                   | 29.4(10.6-70.6)        | 80  | <0.001   | 55.0(15.2-119.1)      | 51  | <0.001   | 94.1(37.0-128.5)      | 13 | <0.001   |
| All TBI                                 | 257.9(48.9-1179.0)     | 243 |          | 332.0(81.5-1610.8)    | 188 |          | 408.9(119.1-1291.7)   | 60 |          |
| OC (Ref:All TBI)                        | 12.9(6.2-19.1)         | 7   | (<0.001) | 6.4(2.5-7.5)          | 9   | (<0.001) | 17.8(16.3-19.2)       | 2  | (0.024)  |
| HC (Ref: All TBI)                       | 5.0 (2.0-10.0)         | 129 | <0.001   | 10.0(5.0-15.0)        | 58  | <0.001   | 28.5(25.3-38.8)       | 22 | <0.001   |
| <b>Day 5</b>                            |                        |     |          |                       |     |          |                       |    |          |
| TBI/CT+                                 | 218.6(100.3-639.6)     | 114 |          | 276.18(70.0-1081.6)   | 92  |          | 286.4(106.4-1216.6)   | 29 |          |
| TBI/CT- (Ref:TBI/CT+)                   | 15.2(9.8-41.8)         | 39  | <0.001   | 19.3(12.6-30.1)       | 28  | <0.001   | 36.0(36.0-36.0)       | 1  | (N/A)    |
| All TBI                                 | 136.3(35.0-451.9)      | 157 |          | 157.0(27.7-873.8)     | 127 |          | 212.3(96.0-1038.3)    | 31 |          |
| OC (Ref:All TBI)                        | 4.5(3.4-5.0)           | 4   | (0.001)  | 1.9(1.6-4.0)          | 4   | (<0.001) | 22.5(19.7-22.9)       | 4  | (0.004)  |
| HC (Ref: All TBI)                       | 5.0 (2.0-10.0)         | 129 | <0.001   | 10.0(5.0-15.0)        | 58  | <0.001   | 28.5(25.3-38.8)       | 22 | <0.001   |
| <b>Week 2</b>                           |                        |     |          |                       |     |          |                       |    |          |
| TBI/CT+                                 | 64.4(36.3-144.4)       | 168 |          | 46.0(22.0-131.0)      | 134 |          | 59.9(33.9-102.3)      | 49 |          |
| TBI/CT- (Ref:TBI/CT+)                   | 13.4(7.4-24.9)         | 87  | <0.001   | 17.5(12.0-26.3)       | 54  | <0.001   | 29.0(20.5-41.8)       | 13 | 0.0187   |
| All TBI                                 | 24.9(15.8-105.5)       | 261 |          | 34.4(16.6-99.5)       | 198 |          | 54.2(26.9-96.8)       | 63 |          |
| OC (Ref:All TBI)                        | 7.0(4.2-10.6)          | 10  | <0.001   | 6.0(2.9-8.3)          | 10  | <0.001   | 21.2(16.3-24.0)       | 4  | (0.0129) |
| HC (Ref: All TBI)                       | 5.0 (2.0-10.0)         | 129 | <0.001   | 10.0(5.0-15.0)        | 58  | <0.001   | 28.5(25.3-38.8)       | 22 | 0.009    |
| <b>UCH-LI, pg/mL</b>                    |                        |     |          |                       |     |          |                       |    |          |
| <b>Day 1</b>                            |                        |     |          |                       |     |          |                       |    |          |
| TBI/CT+                                 | 458.6(263.1- 1110.9)   | 168 |          | 504.1(249.6-1012.5)   | 134 |          | 276.0(164.0-666.8)    | 49 |          |
| TBI/CT- (Ref:TBI/CT+)                   | 280.8(155.6- 548.8)    | 87  | <0.001   | 271.1(173.7-441.7)    | 54  | <0.001   | 224.0(142.5-265.2)    | 13 | 0.265    |
| All TBI                                 | 409.5(203.6- 890.0)    | 261 |          | 397.1(199.1-888.3)    | 198 |          | 256.8(158.1-639.6)    | 63 |          |
| OC (Ref:All TBI)                        | 150.3(90.5- 240.4)     | 10  | 0.001    | 165.4(116.4-211.4)    | 10  | 0.005    | 187.1(88.0-311.4)     | 4  | (0.261)  |
| HC (Ref:All TBI)                        | 47.0(37.0- 68.0)       | 129 | <0.001   | 74.0(52.3-96.0)       | 58  | <0.001   | 109.0(75.3-156.8)     | 22 | <0.001   |
| <b>Day 3</b>                            |                        |     |          |                       |     |          |                       |    |          |
| TBI/CT+                                 | 101.9(56.0- 172.7)     | 158 |          | 117.3(66.6-208.6)     | 128 |          | 112.7(67.4-167.2)     | 46 |          |
| TBI/CT- (Ref:TBI/CT+)                   | 77.1(50.7- 128.5)      | 80  | 0.027    | 75.0(55.0-128.6)      | 51  | 0.003    | 106.3(71.0-143.5)     | 13 | 0.766    |
| All TBI                                 | 91.9(54.0- 146.3)      | 243 |          | 109.6(63.3-192.2)     | 188 |          | 112.7(69.3-165.6)     | 60 |          |
| OC (Ref:All TBI)                        | 83.9(66.1- 115.7)      | 7   | (0.981)  | 54.9(54.2-87.4)       | 9   | (0.009)  | 170.8(150.9-190.6)    | 2  | (0.329)  |
| HC (Ref:All TBI)                        | 47.0(37.0- 68.0)       | 129 | <0.001   | 74.0(52.3-96.0)       | 58  | <0.001   | 109.0(75.3-156.8)     | 22 | 0.754    |
| <b>Day 5</b>                            |                        |     |          |                       |     |          |                       |    |          |
| TBI/CT+                                 | 80.2(50.3-128.1)       | 114 |          | 107.0(78.6-159.7)     | 92  |          | 105.6(75.406-149.062) | 29 |          |
| TBI/CT- (Ref:TBI/CT+)                   | 73.8(53.5-120.8)       | 39  | 0.680    | 84.7(63.6-129.2)      | 28  | 0.095    | 50.0(50.0-50.0)       | 1  | (N/A)    |
| All TBI                                 | 80.2(52.7-125.5)       | 157 |          | 105.2(75.5-152.9)     | 127 |          | 105.6(73.9- 142.5)    | 31 |          |



|                          |                     |     |         |                    |     |         |                       |    |         |
|--------------------------|---------------------|-----|---------|--------------------|-----|---------|-----------------------|----|---------|
| OC<br>(Ref:All TBI)      | 73.4(57.4-84.9)     | 4   | (0.441) | 74.7(59.6-103.1)   | 4   | (0.276) | 111.95(66.35-173.507) | 4  | (0.940) |
| HC<br>(Ref:All TBI)      | 47.0(37.0- 68.0)    | 129 | <0.001  | 74.0(52.3-96.0)    | 58  | <0.001  | 109.0(75.3-156.8)     | 22 | 0.738   |
| <b>Week 2</b>            |                     |     |         |                    |     |         |                       |    |         |
| TBI/CT+                  | 81.6(52.1-129.7)    | 168 |         | 106.0(70.5-179.2)  | 134 |         | 113.4(74.8-181.6)     | 49 |         |
| TBI/CT-<br>(Ref:TBI/CT+) | 68.9(42.9-93.7)     | 87  | 0.014   | 80.5(53.6-117.8)   | 54  | 0.006   | 109.0(81.4-130.8)     | 13 | 0.505   |
| All TBI                  | 76.5(49.1-125.1)    | 261 |         | 102.6(64.7-168.0)  | 198 |         | 109.3(76.4-171.3)     | 63 |         |
| OC<br>(Ref:All TBI)      | 71.2(61.8-91.4)     | 10  | 0.886   | 92.2(57.6-104.7)   | 10  | 0.237   | 100.5(56.0-147.8)     | 4  | (0.615) |
| HC<br>(Ref:All TBI)      | 47.0(37.0- 68.0)    | 129 | <0.001  | 74.0(52.3-96.0)    | 58  | <0.001  | 109.0(75.3-156.8)     | 22 | 0.794   |
| <b>SI00B</b>             |                     |     |         |                    |     |         |                       |    |         |
| <b>Day 1</b>             |                     |     |         |                    |     |         |                       |    |         |
| TBI/CT+                  | 0.286(0.144-0.560)  | 163 |         | 0.229(0.140-0.600) | 134 |         | 0.206(0.112-0.399)    | 47 |         |
| TBI/CT-<br>(Ref:TBI/CT+) | 0.192(0.090-0.301)  | 82  | <0.001  | 0.145(0.074-0.251) | 53  | <0.001  | 0.096(0.083-0.155)    | 13 | 0.041   |
| All TBI                  | 0.243(0.134-0.466)  | 251 |         | 0.204(0.119-0.416) | 197 |         | 0.164(0.096-0.360)    | 61 |         |
| OC<br>(Ref:All TBI)      | 0.0690(0.064-0.092) | 10  | <0.001  | 0.096(0.081-0.132) | 10  | 0.003   | 0.071(0.062-0.082)    | 4  | (0.011) |
| HC<br>(Ref:All TBI)      | 0.041(0.032-0.056)  | 129 | <0.001  | 0.051(0.035-0.066) | 58  | <0.001  | 0.043(0.035-0.074)    | 22 | <0.001  |
| <b>Day 3</b>             |                     |     |         |                    |     |         |                       |    |         |
| TBI/CT+                  | 0.096(0.056-0.178)  | 151 |         | 0.106(0.062-0.208) | 128 |         | 0.110(0.069-0.154)    | 44 |         |
| TBI/CT-<br>(Ref:TBI/CT+) | 0.077(0.052-0.104)  | 75  | 0.015   | 0.065(0.044-0.084) | 49  | <0.001  | 0.055(0.047-0.084)    | 13 | 0.011   |
| All TBI                  | 0.086(0.054-0.148)  | 231 |         | 0.092(0.054-0.177) | 185 |         | 0.084(0.062-0.144)    | 58 |         |
| OC<br>(Ref:All TBI)      | 0.043(0.039-0.072)  | 7   | (0.032) | 0.047(0.043-0.070) | 9   | (0.036) | 0.062(0.054-0.071)    | 2  | (0.294) |
| HC<br>(Ref:All TBI)      | 0.041(0.032-0.056)  | 129 | <0.001  | 0.051(0.035-0.066) | 58  | <0.001  | 0.043(0.035-0.074)    | 22 | <0.001  |
| <b>Day 5</b>             |                     |     |         |                    |     |         |                       |    |         |
| TBI/CT+                  | 0.064(0.044-0.101)  | 110 |         | 0.086(0.051-0.130) | 91  |         | 0.116(0.077-0.173)    | 29 |         |
| TBI/CT-<br>(Ref:TBI/CT+) | 0.074(0.041-0.105)  | 36  | 0.987   | 0.054(0.039-0.073) | 26  | 0.003   | 0.071(0.071-0.071)    | 1  | (N/A)   |
| All TBI                  | 0.066(0.043-0.103)  | 150 |         | 0.074(0.046-0.120) | 124 |         | 0.115(0.077-0.159)    | 31 |         |
| OC<br>(Ref:All TBI)      | 0.063(0.054-0.072)  | 4   | (0.760) | 0.049(0.045-0.051) | 4   | (0.095) | 0.068(0.061-0.090)    | 4  | (0.161) |
| HC<br>(Ref:All TBI)      | 0.041(0.032-0.056)  | 129 | <0.001  | 0.051(0.035-0.066) | 58  | <0.001  | 0.043(0.035-0.074)    | 22 | <0.001  |
| <b>Week 2</b>            |                     |     |         |                    |     |         |                       |    |         |
| TBI/CT+                  | 0.05(0.031-0.073)   | 129 |         | 0.048(0.032-0.076) | 102 |         | 0.063(0.048-0.100)    | 41 |         |
| TBI/CT-<br>(Ref:TBI/CT+) | 0.051(0.029-0.085)  | 45  | 0.973   | 0.044(0.034-0.056) | 29  | 0.350   | 0.053(0.044-0.064)    | 8  | (0.256) |
| All TBI                  | 0.050(0.030-0.073)  | 180 |         | 0.047(0.033-0.074) | 141 |         | 0.062(0.047-0.088)    | 50 |         |
| OC<br>(Ref:All TBI)      | 0.039(0.034-0.050)  | 9   | (0.173) | 0.052(0.038-0.077) | 10  | 0.613   | 0.038(0.033-0.059)    | 4  | (0.306) |
| HC<br>(Ref:All TBI)      | 0.041(0.032-0.056)  | 129 | 0.033   | 0.051(0.035-0.066) | 58  | 0.970   | 0.043(0.035-0.074)    | 22 | 0.171   |
| <b>NSE</b>               |                     |     |         |                    |     |         |                       |    |         |
| <b>Day 1</b>             |                     |     |         |                    |     |         |                       |    |         |
| TBI/CT+                  | 34.48(23.12-53.63)  | 163 |         | 26.30(19.19-50.47) | 134 |         | 19.55(13.75-37.7)     | 47 |         |
| TBI/CT-<br>(Ref:TBI/CT+) | 24.23(14.96-42.73)  | 82  | <0.001  | 20.47(15.26-29.79) | 53  | 0.007   | 18.45(16.06-37.72)    | 13 | >0.999  |
| All TBI                  | 31.64(20.34-49.61)  | 251 |         | 24.33(18.24-47.59) | 197 |         | 19.27(14.97-37.72)    | 61 |         |
| OC<br>(Ref:All TBI)      | 14.16(13.00-15.51)  | 10  | <0.001  | 13.02(9.663-21.59) | 10  | 0.016   | 13.02(8.613-27.14)    | 4  | (0.346) |
| HC<br>(Ref:All TBI)      | 12.13(10.27-14.28)  | 129 | <0.001  | 12.59(11.12-15.45) | 58  | <0.001  | 13.72(11.34-21.74)    | 22 | 0.049   |
| <b>Day 3</b>             |                     |     |         |                    |     |         |                       |    |         |
| TBI/CT+                  | 15.73(10.91-24.07)  | 151 |         | 15.50(11.72-22.52) | 128 |         | 13.16(10.03-19.88)    | 44 |         |
| TBI/CT-<br>(Ref:TBI/CT+) | 13.03(10.62-16.60)  | 75  | 0.014   | 12.80(9.96-19.80)  | 49  | 0.104   | 13.34(12.89-15.57)    | 13 | 0.939   |
| All TBI                  | 14.59(10.66-20.77)  | 231 |         | 14.85(11.10-22.06) | 186 |         | 13.16(10.58-17.41)    | 58 |         |
| OC<br>(Ref:All TBI)      | 9.85(7.96-26.39)    | 7   | (0.547) | 8.61(6.86-13.02)   | 9   | (0.004) | 17.29(15.21-19.36)    | 2  | (0.422) |

|                          |                    |     |         |                     |     |         |                    |    |         |
|--------------------------|--------------------|-----|---------|---------------------|-----|---------|--------------------|----|---------|
| HC<br>(Ref:All TBI)      | 12.13(10.27-14.28) | 129 | <0.001  | 12.59(11.12-15.45)  | 58  | 0.009   | 13.72(11.34-21.74) | 22 | 0.316   |
| <b>Day 5</b>             |                    |     |         |                     |     |         |                    |    |         |
| TBI/CT+                  | 14.53(10.62-22.61) | 110 |         | 15.15(12.04-24.055) | 91  |         | 14.93(10.63-18.58) | 29 |         |
| TBI/CT-<br>(Ref:TBI/CT+) | 15.02(11.80-19.60) | 36  | 0.910   | 12.81(11.16-15.33)  | 26  | 0.100   | 20.88(20.88-20.88) | 1  | (N/A)   |
| All TBI                  | 14.50(10.67-20.54) | 150 |         | 14.39(11.50-22.84)  | 124 |         | 14.93(10.58-19.73) | 31 |         |
| OC<br>(Ref:All TBI)      | 15.79(14.00-17.19) | 4   | (0.977) | 10.06(9.00-10.71)   | 4   | (0.024) | 17.36(12.39-23.09) | 4  | (0.531) |
| HC<br>(Ref:All TBI)      | 12.13(10.27-14.28) | 129 | 0.001   | 12.59(11.12-15.45)  | 58  | 0.012   | 13.72(11.34-21.74) | 22 | 0.549   |
| <b>Week 2</b>            |                    |     |         |                     |     |         |                    |    |         |
| TBI/CT+                  | 19.41(13.56-27.19) | 129 |         | 18.7(14.38-33.82)   | 103 |         | 16.18(13.14-21.91) | 41 |         |
| TBI/CT-<br>(Ref:TBI/CT+) | 14.41(10.38-18.47) | 45  | <0.001  | 14.09(11.63-20.28)  | 29  | 0.006   | 15.70(12.41-21.16) | 8  | (0.760) |
| All TBI                  | 17.41(12.86-25.50) | 180 |         | 17.34(13.6-28.21)   | 142 |         | 16.05(12.87-21.89) | 50 |         |
| OC<br>(Ref:All TBI)      | 16.46(13.59-17.46) | 9   | (0.820) | 12.79(9.74-14.14)   | 10  | 0.005   | 14.38(13.76-16.89) | 4  | (0.804) |
| HC<br>(Ref:All TBI)      | 12.13(10.27-14.28) | 129 | <0.001  | 12.59(11.12-15.45)  | 58  | <0.001  | 13.72(11.34-21.74) | 22 | 0.467   |

Notes: HC samples were drawn only at baseline as there is no index injury for comparison. Baseline HC biomarker levels are compared to longitudinal levels in patients with TBI. P-values for comparisons in which at least one cell contains fewer than 10 individuals are shown in parentheses.

Abbreviations: As defined in Supplemental Table 4.

**Supplemental Table 8. Discriminative value of day 1, day 3, day 5, and week 2 UCH-L1, NSE, and S100B stratified by age**

| Values are AUC (95% CI)    | 17-39y                     | 40-64y                     | 65-90y                     |
|----------------------------|----------------------------|----------------------------|----------------------------|
| <b>UCHL-1</b>              |                            |                            |                            |
| <b>TBI/CT+ vs. TBI/CT-</b> |                            |                            |                            |
| Day 1                      | 0.656 (0.586,0.725)        | 0.656 (0.571,0.742)        | 0.603 (0.434,0.772)        |
| Day 3                      | 0.588 (0.513,0.662)        | 0.645 (0.556,0.733)        | 0.528 (0.350,0.707)        |
| Day 5                      | 0.522 (0.421,0.623)        | 0.605 (0.479,0.730)        | NA**                       |
| Week 2                     | 0.594 (0.521,0.667)        | 0.629 (0.541,0.717)        | 0.562 (0.398,0.726)        |
| <b>TBI vs. OC</b>          |                            |                            |                            |
| Day 1                      | 0.799 (0.701,0.897)        | 0.766 (0.627,0.904)        | 0.671 (0.358,0.983)        |
| Day 3                      | 0.497 (0.305,0.689)        | 0.758 (0.605,0.911)        | 0.708 (0.474,0.943)        |
| Day 5                      | 0.614 (0.400,0.828)        | 0.661 (0.370,0.953)        | 0.484 (0.098,0.870)        |
| Week 2                     | 0.486 (0.337,0.636)        | 0.611 (0.468,0.755)        | 0.577 (0.192,0.963)        |
| <b>TBI vs. HC</b>          |                            |                            |                            |
| Day 1                      | <b>0.963 (0.946,0.98)</b>  | <b>0.932 (0.902,0.962)</b> | <b>0.800 (0.702,0.898)</b> |
| Day 3                      | 0.751 (0.701,0.801)        | 0.675 (0.603,0.748)        | 0.477 (0.344,0.610)        |
| Day 5                      | 0.732 (0.674,0.790)        | 0.693 (0.612,0.774)        | 0.528 (0.369,0.687)        |
| Week 2                     | 0.703 (0.650,0.756)        | 0.651 (0.577,0.724)        | 0.481 (0.343,0.619)        |
| <b>S100B</b>               |                            |                            |                            |
| <b>TBI/CT+ vs. TBI/CT-</b> |                            |                            |                            |
| Day 1                      | 0.637 (0.565,0.709)        | 0.696 (0.612,0.780)        | 0.687 (0.523,0.852)        |
| Day 3                      | 0.600 (0.523,0.676)        | 0.703 (0.622,0.784)        | 0.734 (0.570,0.898)        |
| Day 5                      | 0.499 (0.389,0.609)        | 0.691 (0.577,0.805)        | NA**                       |
| Week 2                     | 0.498 (0.400,0.596)        | 0.557 (0.444,0.607)        | 0.630 (0.421,0.838)        |
| <b>TBI vs. OC</b>          |                            |                            |                            |
| Day 1                      | <b>0.854 (0.764,0.944)</b> | 0.777 (0.652,0.902)        | <b>0.883 (0.783,0.984)</b> |
| Day 3                      | 0.739 (0.573,0.905)        | 0.707 (0.561,0.853)        | 0.724 (0.407,1)            |
| Day 5                      | 0.563 (0.293,0.834)        | 0.747 (0.644,0.850)        | 0.722 (0.449,0.994)        |
| Week 2                     | 0.635 (0.506,0.763)        | 0.548 (0.379,0.717)        | 0.657 (0.325,0.990)        |
| <b>TBI vs. HC</b>          |                            |                            |                            |
| Day 1                      | <b>0.950 (0.925,0.974)</b> | <b>0.922 (0.887,0.957)</b> | <b>0.899 (0.825,0.972)</b> |
| Day 3                      | <b>0.821 (0.778,0.864)</b> | 0.756 (0.690,0.821)        | 0.754 (0.635,0.874)        |
| Day 5                      | 0.736 (0.678,0.794)        | 0.691 (0.612,0.771)        | <b>0.818 (0.698,0.938)</b> |
| Week 2                     | 0.571 (0.508,0.635)        | 0.502 (0.416,0.588)        | 0.602 (0.452,0.753)        |
| <b>NSE</b>                 |                            |                            |                            |
| <b>TBI/CT+ vs. TBI/CT-</b> |                            |                            |                            |
| Day 1                      | 0.631 (0.555,0.708)        | 0.628 (0.542,0.714)        | 0.499 (0.331,0.667)        |
| Day 3                      | 0.601 (0.526,0.676)        | 0.579 (0.481,0.677)        | 0.508 (0.349,0.667)        |
| Day 5                      | 0.494 (0.391,0.596)        | 0.606 (0.486,0.727)        | NA**                       |
| Week 2                     | 0.694 (0.606,0.782)        | 0.669 (0.559,0.778)        | 0.537 (0.286,0.787)        |
| <b>TBI vs. OC</b>          |                            |                            |                            |
| Day 1                      | <b>0.841 (0.742,0.939)</b> | 0.726 (0.529,0.923)        | 0.643 (0.231,1)            |
| Day 3                      | 0.567 (0.258,0.876)        | 0.789 (0.650,0.929)        | 0.672 (0.321,1)            |
| Day 5                      | 0.505 (0.298,0.712)        | <b>0.833 (0.725,0.940)</b> | 0.605 (0.339,0.871)        |
| Week 2                     | 0.523 (0.351,0.695)        | 0.765 (0.677,0.854)        | 0.540 (0.301,0.779)        |
| <b>TBI vs. HC</b>          |                            |                            |                            |
| Day 1                      | <b>0.871 (0.831,0.912)</b> | <b>0.851 (0.803,0.899)</b> | 0.643 (0.501,0.784)        |
| Day 3                      | 0.608 (0.550,0.667)        | 0.614 (0.542,0.686)        | 0.573 (0.434,0.713)        |
| Day 5                      | 0.611 (0.544,0.679)        | 0.616 (0.535,0.698)        | 0.450 (0.292,0.609)        |
| Week 2                     | 0.715 (0.656,0.773)        | 0.717 (0.646,0.788)        | 0.555 (0.402,0.707)        |

Notes: **Bolded result** indicates AUC at least 0.8 (at least "good" discrimination).

**\*\*N=1 in the TBI CT- group**

Abbreviations: As defined in Supplemental Tables 4 and 5.

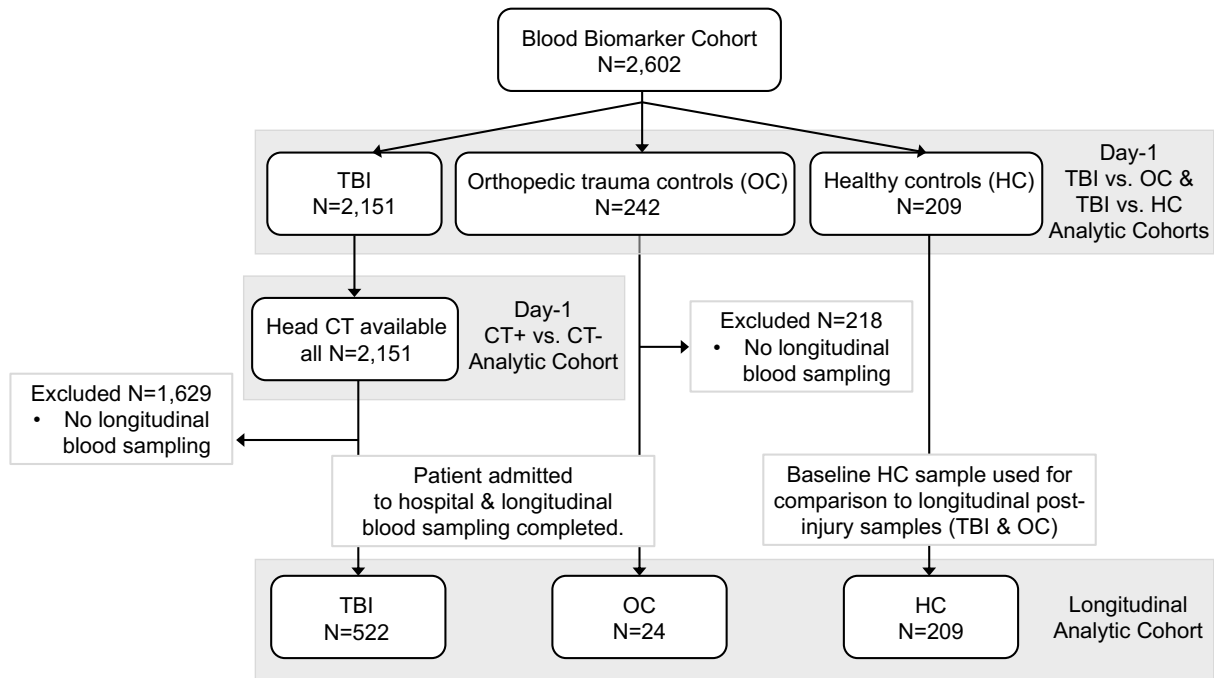

**Supplemental Figure 1. Selection of analytic cohorts**

Participant flow diagram showing selection of cohorts for the day-1 and longitudinal analyses. Abbreviations: TBI = traumatic brain injury

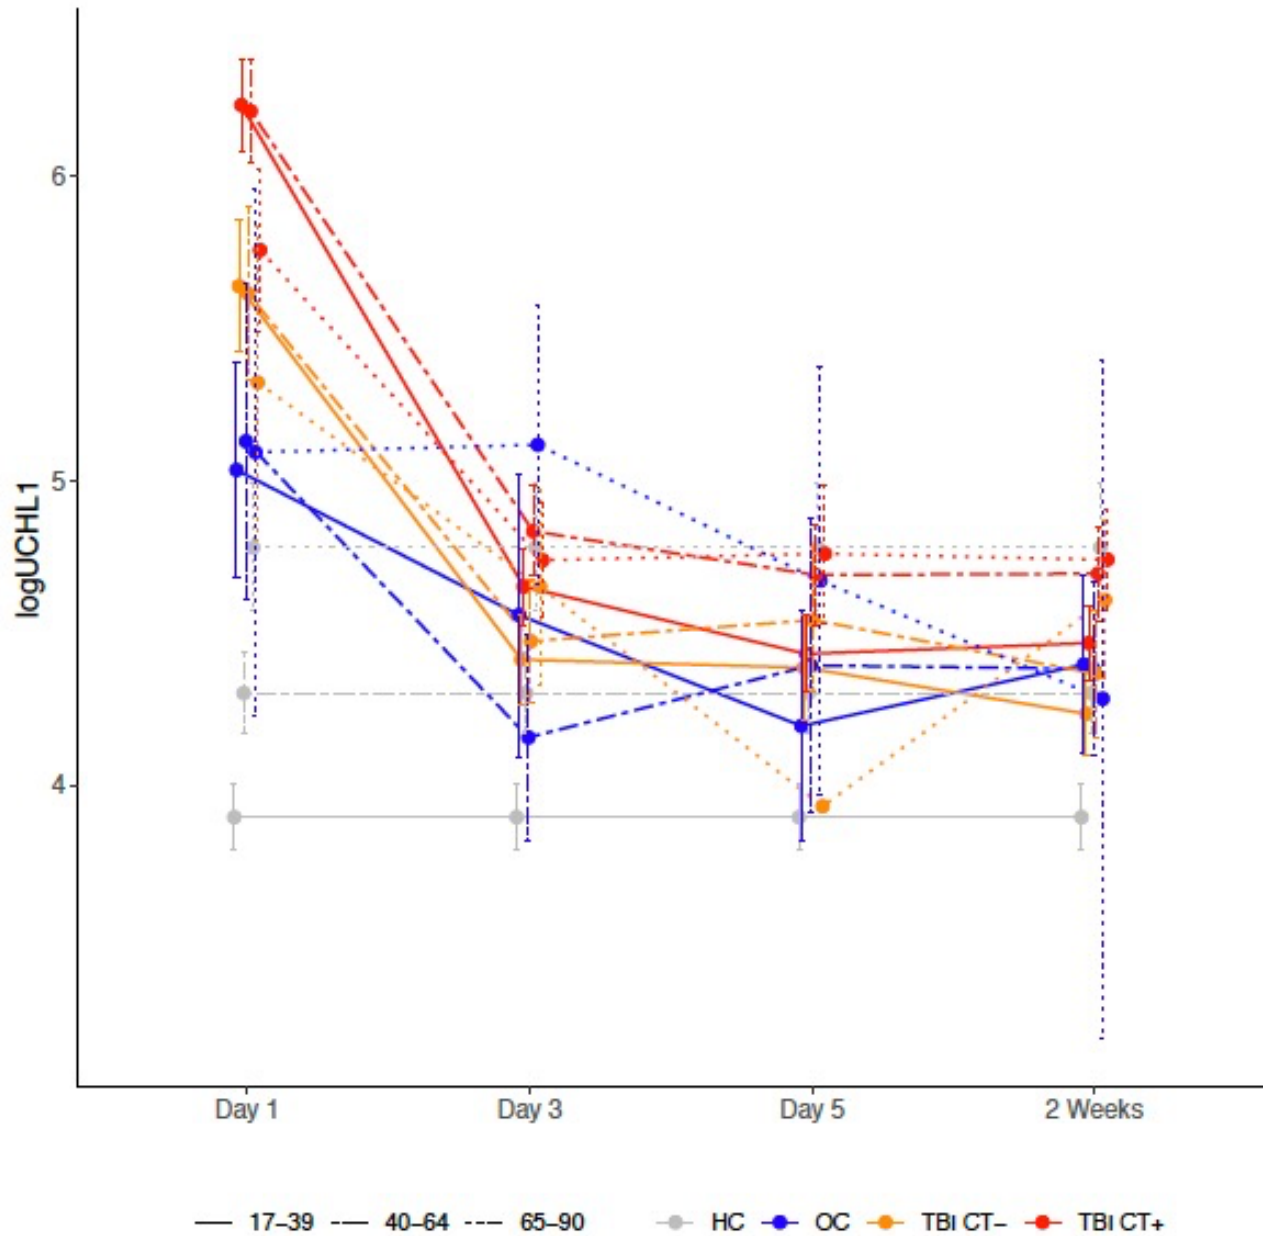

**Supplemental Figure 2. Longitudinal (Day 1 through Week 2) Blood-based UCHL1 Levels Stratified by Diagnostic Group and Age** Mean with 95% confidence intervals is shown for log-transformed UCHL1 levels stratified by age category and diagnostic group, with the same color coding as in Figures 3 and 4. Healthy control biomarker levels were only drawn at a single time-point so the same values are plotted here repeatedly for comparison to the other diagnostic groups over time. Specific blood-biomarker levels and results of Wilcoxon Rank Sum tests comparing levels across diagnostic groups, stratified by age and days post-injury, are reported in Supplemental Table 7.

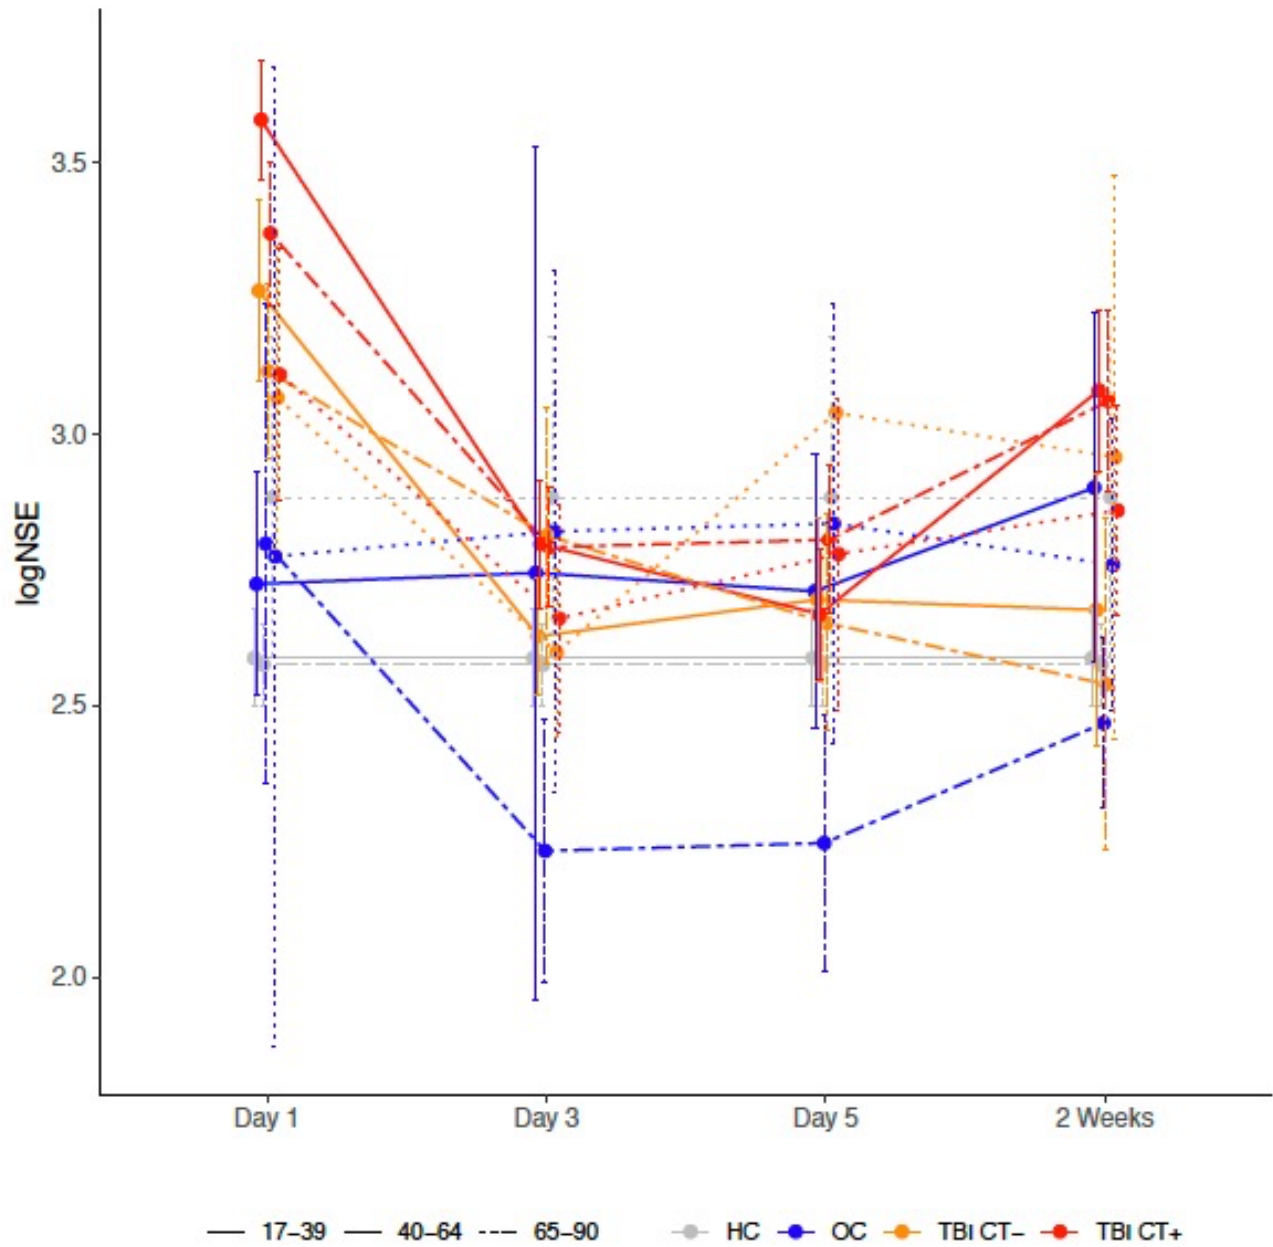

**Supplemental Figure 3. Longitudinal (Day 1 through Week 2) Blood-based NSE Levels Stratified by Diagnostic Group and Age**  
 Mean with 95% confidence intervals is shown for log-transformed NSE levels stratified by age category and diagnostic group, with the same color coding as in Figures 3 and 4. Healthy control biomarker levels were only drawn at a single time-point so the same values are plotted here repeatedly for comparison to the other diagnostic groups over time. Specific blood-biomarker levels and results of Wilcoxon Rank Sum tests comparing levels across diagnostic groups, stratified by age and days post-injury, are reported in Supplemental Table 7.

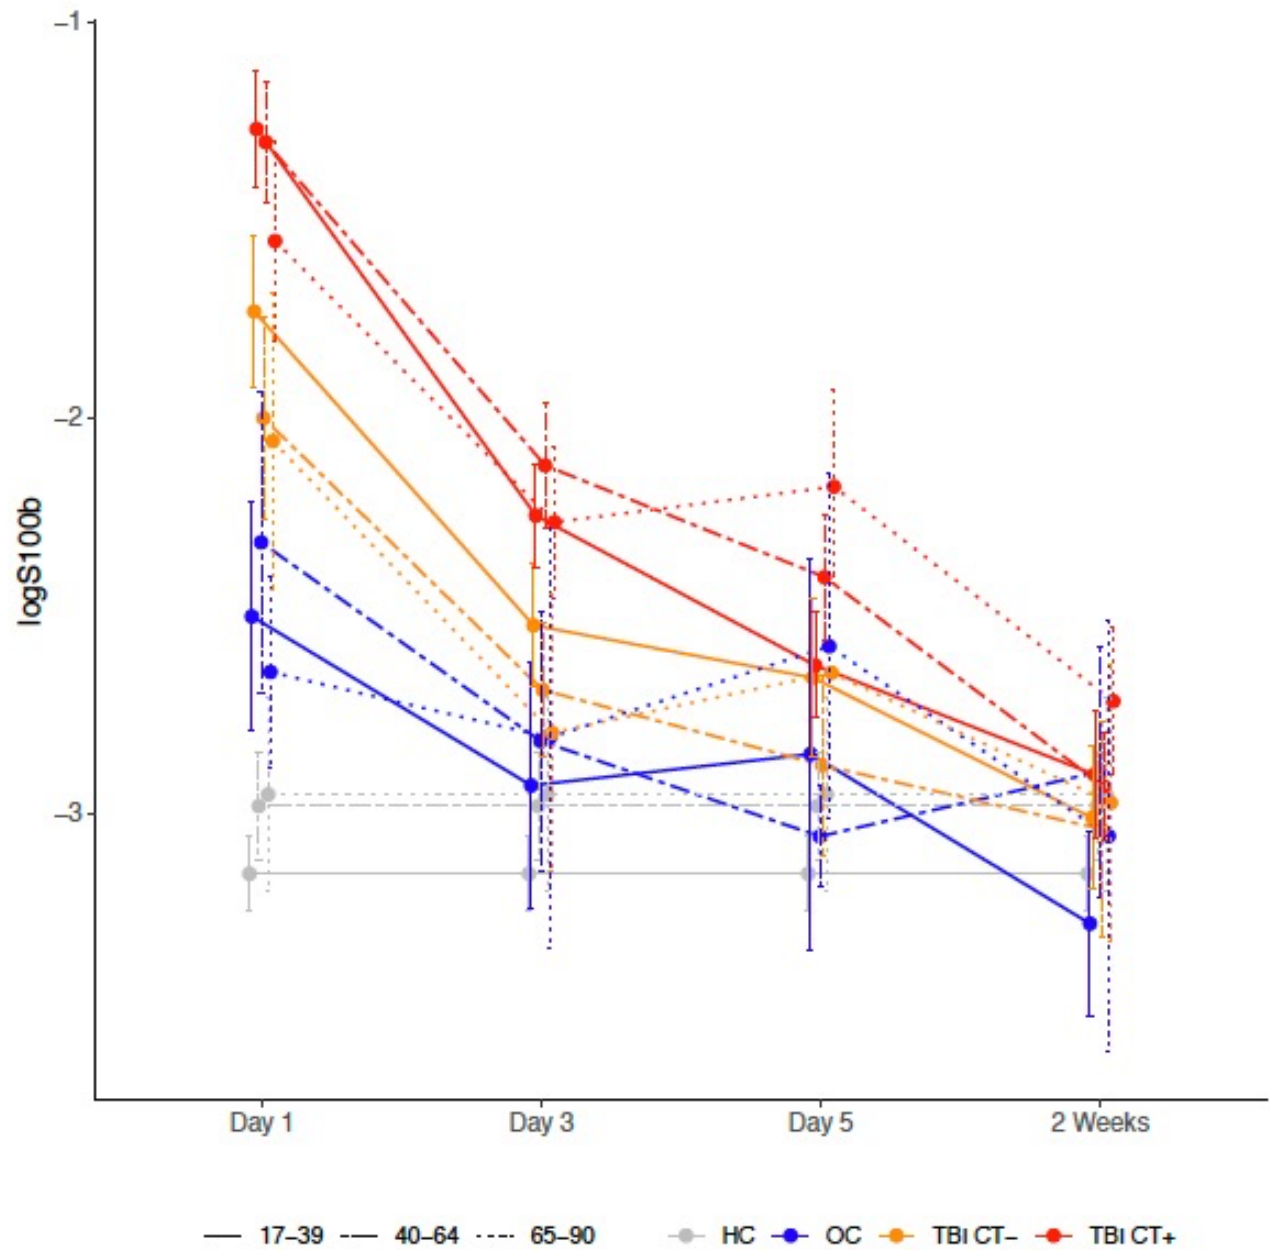

**Supplemental Figure 4. Longitudinal (Day 1 through Week 2) Blood-based S100b Levels Stratified by Diagnostic Group and Age**  
 Mean with 95% confidence intervals is shown for log-transformed S100b levels stratified by age category and diagnostic group, with the same color coding as in Figures 3 and 4. Healthy control biomarker levels were only drawn at a single time-point so the same values are plotted here repeatedly for comparison to the other diagnostic groups over time. Specific blood-biomarker levels and results of Wilcoxon Rank Sum tests comparing levels across diagnostic groups, stratified by age and days post-injury, are reported in Supplemental Table 7.
